# Supplementary material for: Label-free detection of early oligomerization of α-synuclein and its mutants A30P/E46K through solid-state nanopores
Source: Royal Society of Chemistry journal article supplement (doi:10.1039/c9nr00023b), 2019-01-01
Supplement: c9nr00023b1.pdf [file c9nr00023b1.pdf]

## Supporting information for

### Label-free detection of early oligomerization of $\alpha$ -Synuclein and its mutants A30P/E46K through solid-state nanopores

Xiaoqing Li, ‡<sup>a</sup> Xin Tong, ‡<sup>a</sup> Wenlong Lu,<sup>a</sup> Dapeng Yu,<sup>a,b,c</sup> Jiajie Diao,<sup>\*d</sup> Qing Zhao<sup>\*a,b</sup>

<sup>a</sup> *State Key Laboratory for Mesoscopic Physics, School of Physics, Peking University, Beijing 100871, China.*

<sup>b</sup> *Collaborative Innovation Center of Quantum Matter, Beijing 100084, China.*

<sup>c</sup> *Institute for Quantum Science and Technology and Department of Physics, South University of Science and Technology of China (SUSTech), Shenzhen 518055, China.*

<sup>d</sup> *Department of Cancer Biology, University of Cincinnati College of Medicine, Cincinnati, OH 45267, USA.*

†Electronic supplementary information (ESI) available.

‡These authors contributed equally to this work.

Corresponding authors: Email:jiajie.diao@uc.edu, zhaoqing@pku.edu.cn

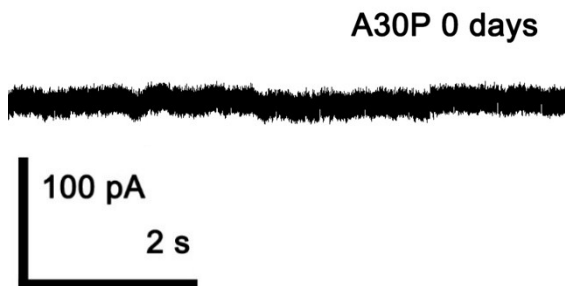

**Fig. S1** Representative current trace arising from A30P monomers for 0 day through a solid-state nanopore at 100 mV in a 0.5 M NaCl solution at pH 8.0.

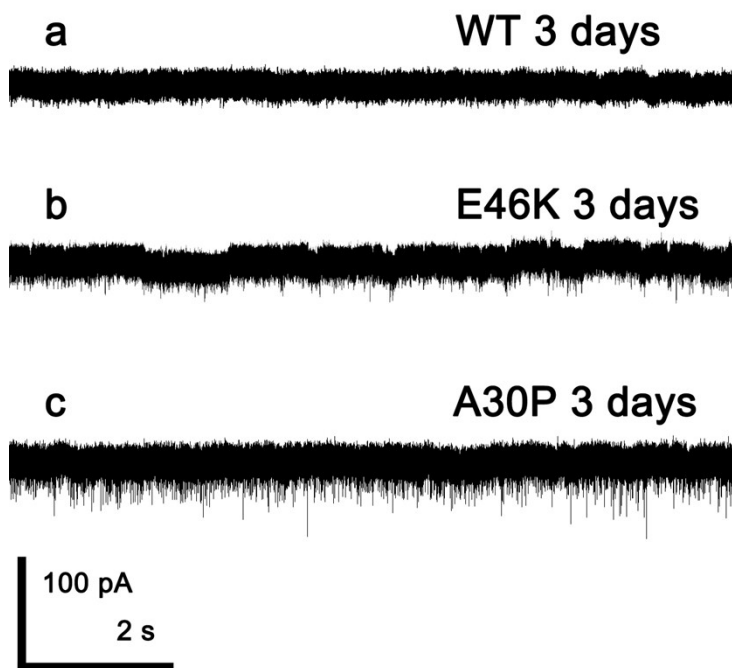

**Fig. S2** Representative current traces arising from  $\alpha$ -Syn samples for 3-day incubation through solid-state nanopores at 100 mV in a 0.5 M NaCl solution at pH 8.0. (a) WT, (b) E46K, (c) A30P.

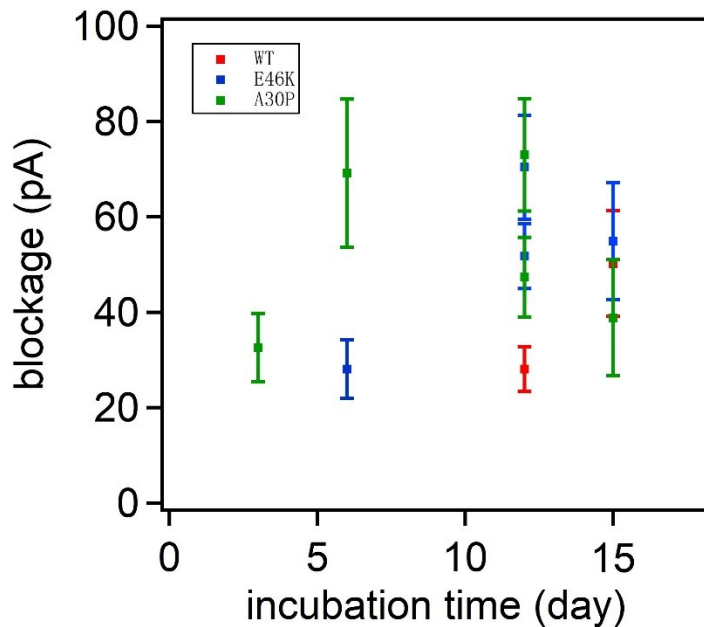

**Fig. S3** Gaussian-fitted peak values of current blockage for three  $\alpha$ -Syn samples as a function of incubation time. The red, blue and green squares indicate WT, E46K and A30P  $\alpha$ -Syn, respectively. At day 12, E46K and A30P give two data points because they have two oligomer types  $O_{II}$  and  $O_{III}$  at this time point.

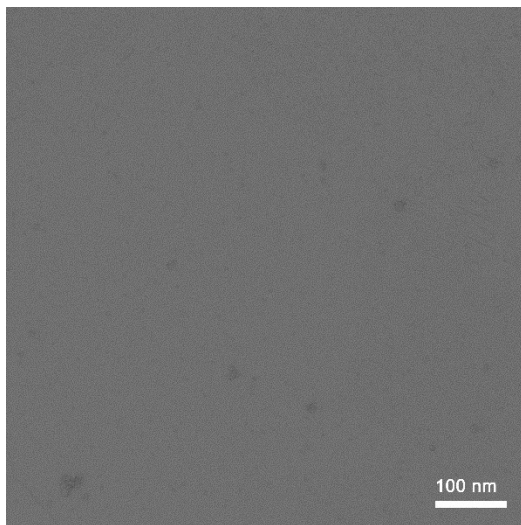

**Fig. S4** Representative TEM image of 6-day A30P samples. Barely samples could be seen in this image.

| Time<br>Sample | 3 days  | 6 days   | 12 days | 15 days |
|----------------|---------|----------|---------|---------|
| WT             | -       | -        | 9.15 Hz | 9.34 Hz |
| E46K           | -       | 2.16Hz   | 2.30 Hz | 2.59 Hz |
| A30P           | 3.09 Hz | 13.77 Hz | 6.33 Hz | 4.10 Hz |

**Table S1** The dependence of capture rates on incubation time for three  $\alpha$ -Syn samples after 3, 6, 12 and 15 days of incubation.
